# Supplementary material for: Catalysis for the synthesis of methacrylic acid and methyl methacrylate
Source: Royal Society of Chemistry journal article supplement (doi:10.1039/c8cs00117k), 2018-01-01
Supplement: c8cs00117k1.zip [file c8cs00117k1.zip]

Received Date

Accepted Date

DOI: 10.1039/xxxxxxxxxxx

[www.rsc.org/journalname](http://www.rsc.org/journalname)
