# Supplementary figures and images for: Catalysis for the synthesis of methacrylic acid and methyl methacrylate
Source: Royal Society of Chemistry journal article supplement (doi:10.1039/c8cs00117k), 2018-01-01

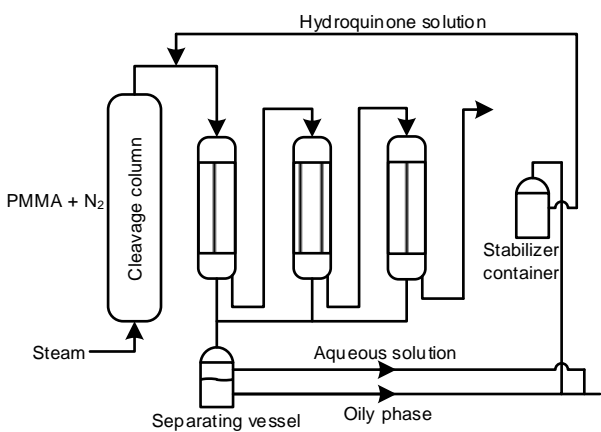

Supplement: c8cs00117k1.zip [file c8cs00117k1.zip]

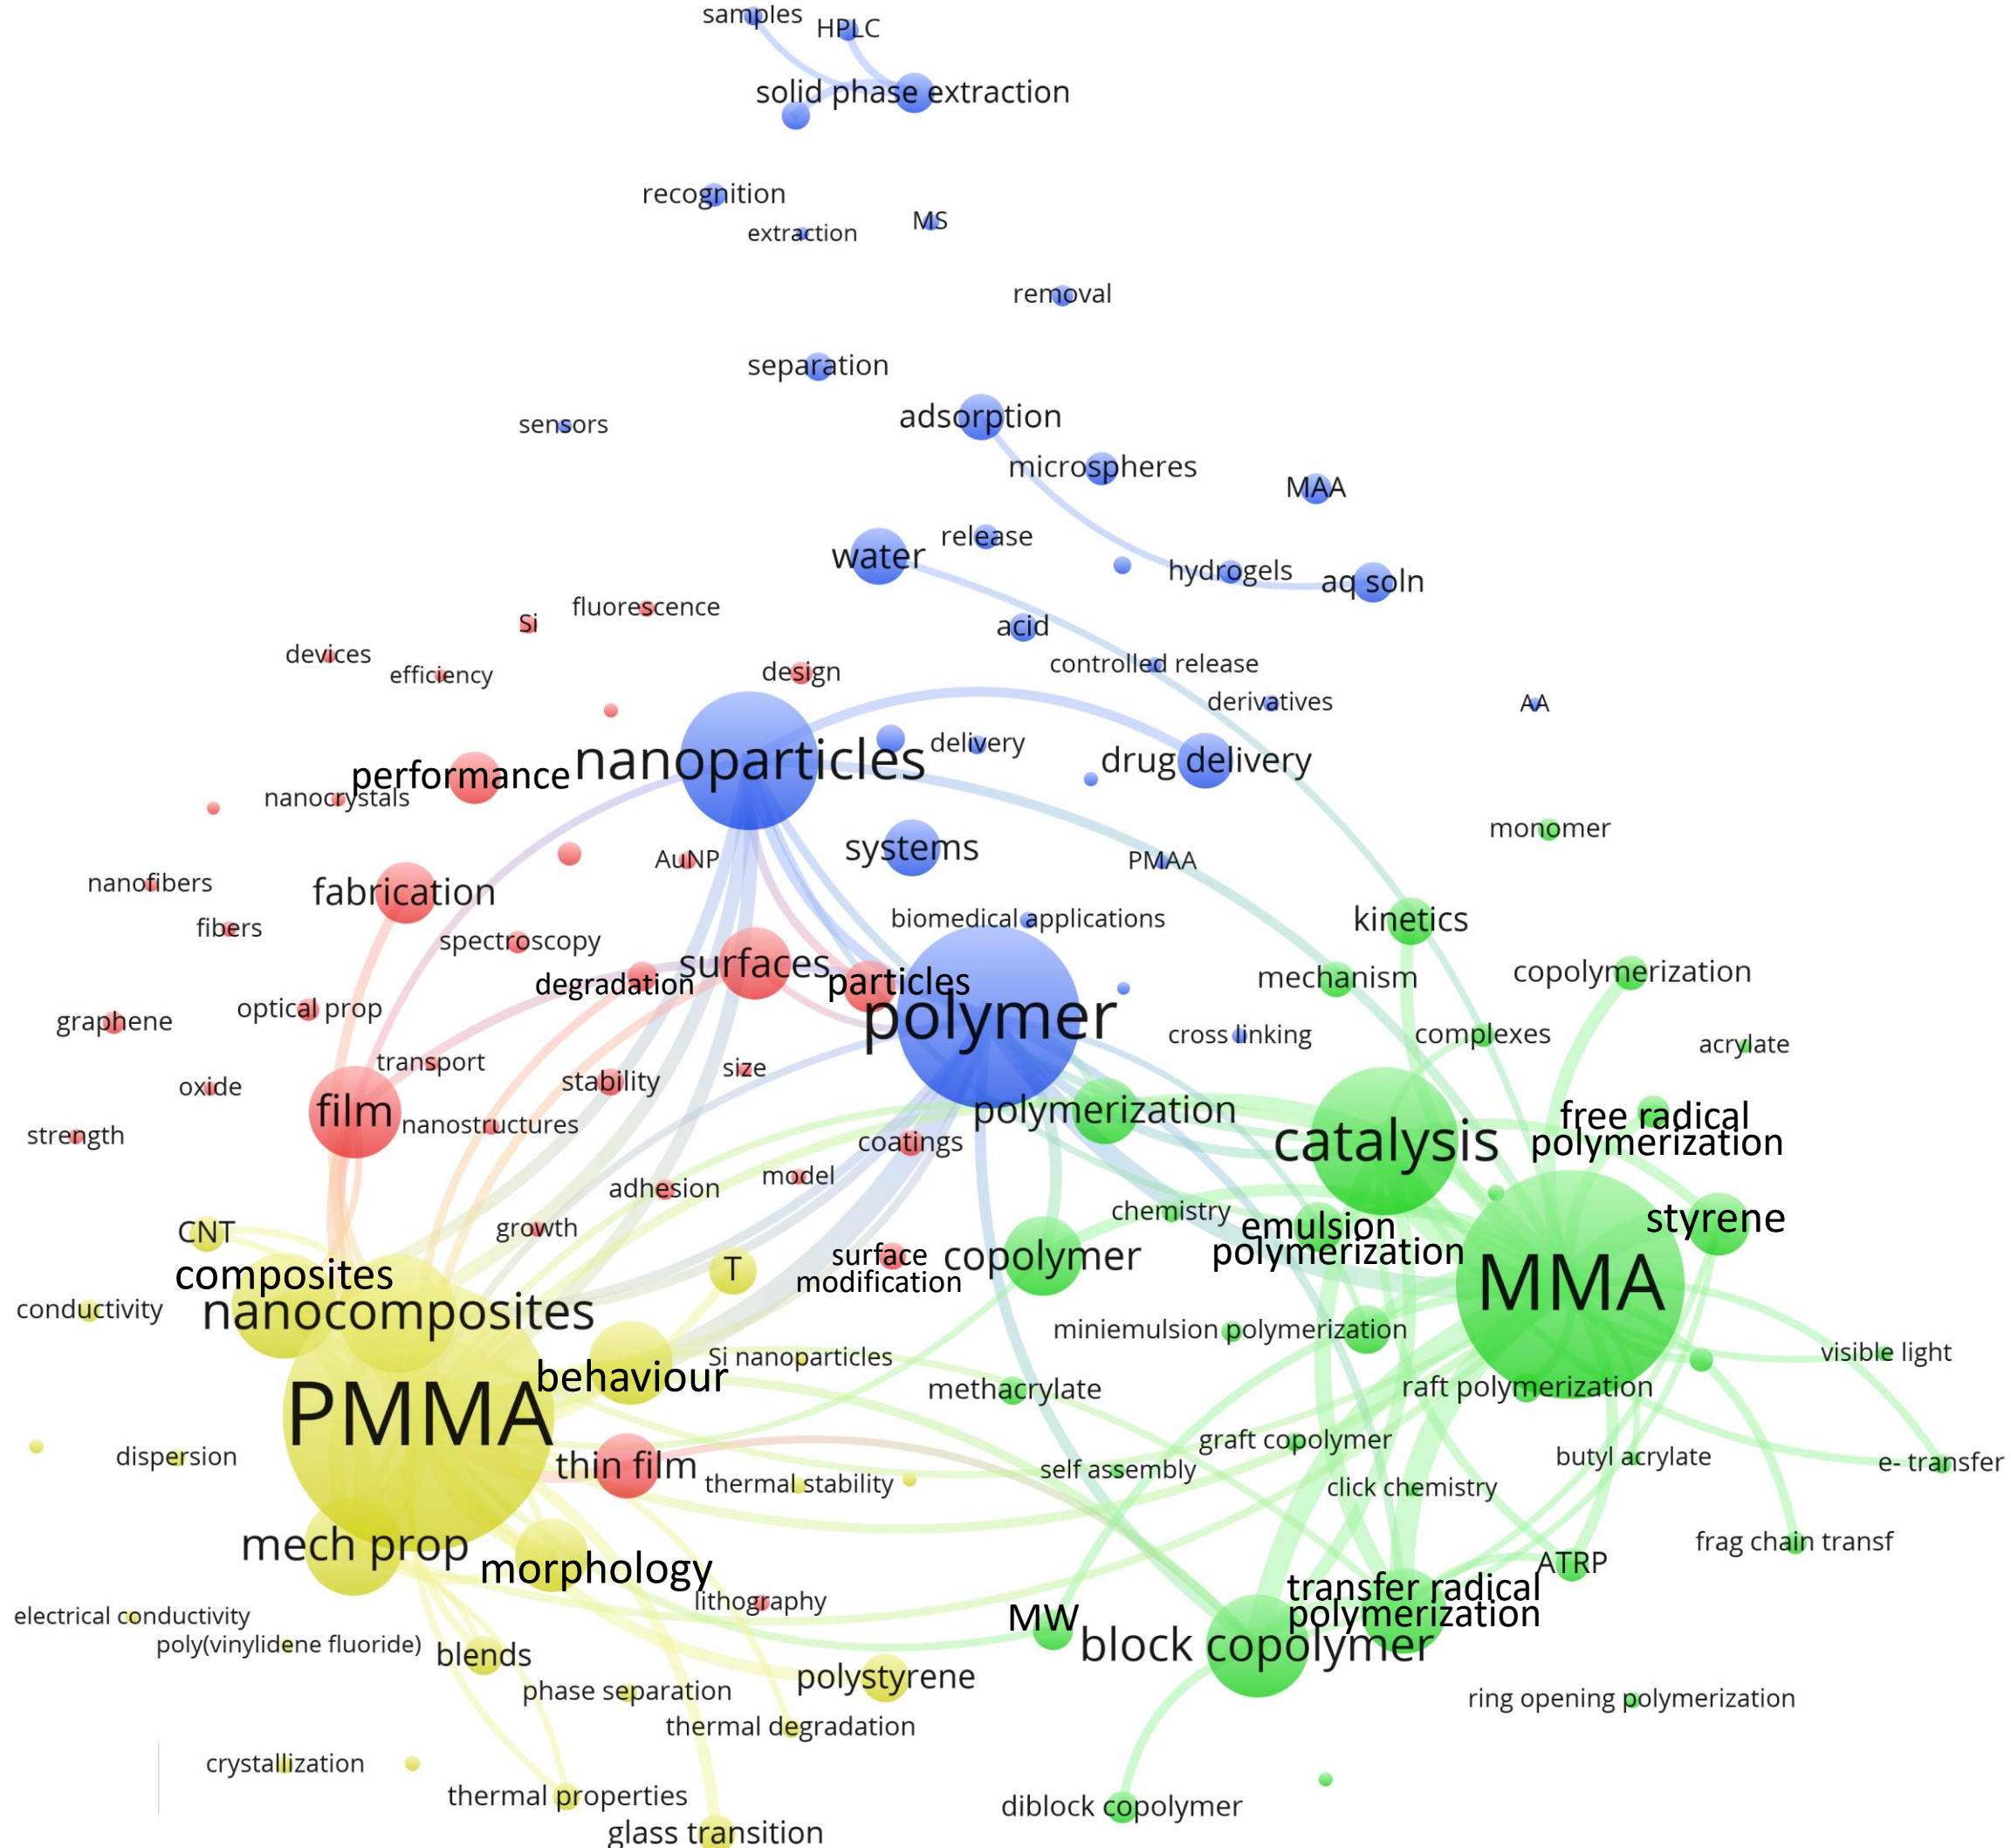

Supplement: c8cs00117k1.zip [file c8cs00117k1.zip]

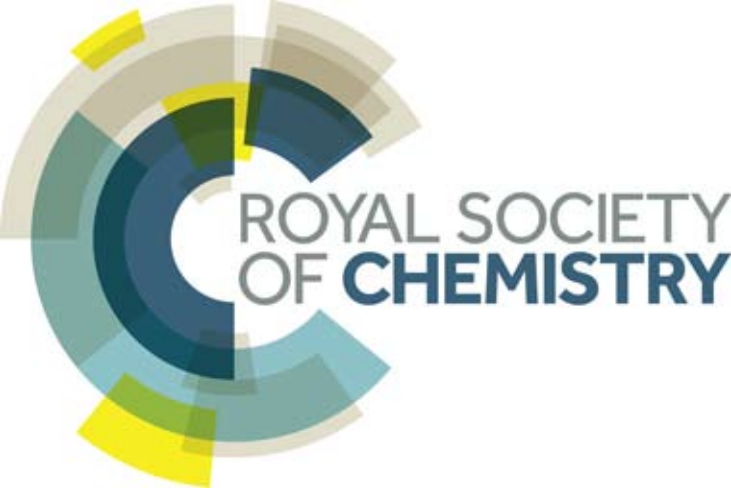

Supplement: c8cs00117k1.zip [file c8cs00117k1.zip]
